# Supplementary material
Source: publisher figshare collection journal article supplement (https://plos.figshare.com/articles/dataset/_/11442822)
Supplement: Supplementary file 1 [file 1 › pone.0226047.s002.pdf]

## Comparison of study demographics to population demographics

To demonstrate the representativeness of the *Qualtrics* sample used in the current study, S1 Table compares the distributions of gender, age, ethnicity, and income of the current sample to population distributions obtained from the 2015 U.S. Census. All categories were within an acceptable range of less than 5% discrepancy ( $M = .88\%$ ), suggesting that the demographic breakdown for this sample closely approximated the demographic breakdown of the national population.

S1 Table

*Demographic comparison of 2015 U.S. census bureau data and Qualtrics sample*

| Demographic Variable        | 2015 U.S. Census Data | Qualtrics Sample |
|-----------------------------|-----------------------|------------------|
| <b>Gender (18+)</b>         |                       |                  |
| Female                      | 51.3%                 | 50.8%            |
| Male                        | 48.7%                 | 49.2%            |
| <b>Age (years)</b>          |                       |                  |
| 18 - 24                     | 12.6%                 | 12.8%            |
| 25 - 34                     | 17.8%                 | 17.6%            |
| 35 - 44                     | 16.4%                 | 16.7%            |
| 45 - 54                     | 17.4%                 | 17.8%            |
| 55 - 64                     | 16.5%                 | 16.4%            |
| 65 and over                 | 19.3%                 | 18.8%            |
| <b>Race/Ethnicity (18+)</b> |                       |                  |
| White                       | 64.6%                 | 61.9%            |
| Black                       | 12.0%                 | 12.4%            |
| Hispanic                    | 15.5%                 | 17.4%            |
| Asian                       | 5.6%                  | 5.3%             |
| American Ind./AK Native     | 0.7%                  | 0.7%             |
| Other                       | 1.6%                  | 2.4%             |
| <b>Household Income</b>     |                       |                  |
| \$0 to < \$25,000           | 22.1%                 | 17.6%            |
| \$25,000 to < \$50,000      | 22.7%                 | 22.5%            |
| \$50,000 to < \$75,000      | 16.7%                 | 19.0%            |
| \$75,000 to < \$100,000     | 12.1%                 | 13.6%            |
| \$100,000 to < \$150,000    | 14.1%                 | 15.1%            |
| \$150,000 to < \$200,000    | 6.2%                  | 6.0%             |
| \$200,000 and above         | 6.1%                  | 6.1%             |

*Note.* Population estimates for gender, age, and race/ethnicity derived from the U.S. Census Bureau, Population Division: April 1, 2010 to July 1, 2015. Retrieved from

<https://factfinder.census.gov/faces/tableservices/jsf/pages/productview.xhtml?src=bkmk>.

Population estimate for household income derived from the U.S. Census Bureau, Current Population Survey: 2015 Annual Social and Economic Supplement. Retrieved from <https://www.census.gov/data/tables/time-series/demo/income-poverty/cps-hinc/hinc-01.2015.html>
